# Supplementary material for: A one-pot three-component synthesis of novel α-sulfamidophosphonates under ultrasound irradiation and catalyst-free conditions
Source: Royal Society of Chemistry journal article supplement (doi:10.1039/c5ra03473f), 2015-01-01
Supplement: c5ra03473f1.pdf [file c5ra03473f1.pdf]

# Supporting Information

## **A one-pot three-component synthesis of novel $\alpha$ -sulfamidophosphonates under ultrasound irradiation and catalyst-free conditions**

*Billel Belhant<sup>a</sup>, Malika Berredjem<sup>\*a</sup>, Marc Le Borgne<sup>b</sup>, Zouhair Bouaziz<sup>b</sup>, Jacques Lebreton<sup>c</sup> and Nour-Eddine Aouf<sup>a</sup>*

<sup>a</sup>Laboratory of Applied Organic Chemistry, Synthesis of biomolecules and molecular modelling Group, Sciences Faculty, Chemistry Department, Badji Mokhtar - Annaba University, Box 12, 23000 Annaba, Algeria

<sup>b</sup>Université de Lyon, Université Lyon 1, Faculté de Pharmacie e ISPB, EA 4446 Biomolécules Cancer et Chimiorésistances, SFR Santé Lyon-Est CNRS UMS3453 e INSERM US7, 8 Avenue Rockefeller, F-69373 Lyon Cedex 8, France

<sup>c</sup>Université de Nantes, UMR CNRS 6230, Chimie Et Interdisciplinarité: Synthèse, Analyse, Modélisation (CEISAM), UFR des Sciences et des Techniques, 2, rue de la Houssinière, BP 92208, 44322 Nantes Cedex 3, France

\*Corresponding author. Email: malika.berredjem@univ-annaba.org, mberredjem@yahoo.fr

|                                                                                                                  |           |
|------------------------------------------------------------------------------------------------------------------|-----------|
| <b>1. Apparatus</b> .....                                                                                        | <b>3</b>  |
| <b>2. General procedure</b> .....                                                                                | <b>3</b>  |
| <b>Scheme 1:</b> One-potsynthesis of $\alpha$ -sulfamidophosphonate under ultrasound irradiations .....          | <b>3</b>  |
| <b>Scheme 2:</b> Mechanistic proposal for synthesis of $\alpha$ -sulfamidophosphonate.....                       | <b>4</b>  |
| <b>3. Selected Spectra data</b> .....                                                                            | <b>4</b>  |
| <sup>1</sup> H NMR spectrum: diethyl phenyl( <i>N</i> -phenylsulfamoylamino)methylphosphonate.....               | <b>8</b>  |
| <sup>13</sup> C NMR spectrum: diethyl phenyl( <i>N</i> -phenylsulfamoylamino)methylphosphonate.....              | <b>8</b>  |
| <sup>31</sup> P NMR spectrum: diethyl phenyl( <i>N</i> -phenylsulfamoylamino)methylphosphonate.....              | <b>9</b>  |
| Mass spectrum: diethyl phenyl( <i>N</i> -phenylsulfamoylamino)methylphosphonate.....                             | <b>9</b>  |
| <sup>1</sup> H NMR spectrum: diethyl phenyl( <i>N</i> -(1-phenylethyl)sulfamoylamino)methylphosphonate.....      | <b>10</b> |
| <sup>31</sup> P NMR spectrum: diethyl phenyl( <i>N</i> -(1-phenylethyl)sulfamoylamino)methylphosphonate.....     | <b>10</b> |
| <sup>1</sup> H NMR spectrum: diethyl ( <i>N</i> -(4-methoxyphenyl)sulfamoylamino)(phenyl)methylphosphonate.....  | <b>11</b> |
| <sup>13</sup> C NMR spectrum: diethyl ( <i>N</i> -(4-methoxyphenyl)sulfamoylamino)(phenyl)methylphosphonate..... | <b>11</b> |
| <sup>31</sup> P NMR spectrum: diethyl ( <i>N</i> -(4-methoxyphenyl)sulfamoylamino)(phenyl)methylphosphonate..... | <b>12</b> |
| <sup>1</sup> H NMR spectrum: diethyl ( <i>N</i> -(2-methoxyphenyl)sulfamoylamino)(phenyl)methylphosphonate.....  | <b>13</b> |
| <sup>31</sup> P NMR spectrum: diethyl ( <i>N</i> -(2-methoxyphenyl)sulfamoylamino)(phenyl)methylphosphonate..... | <b>13</b> |
| <sup>1</sup> H NMR spectrum: diethyl ( <i>N</i> -(3-fluorophenyl)sulfamoylamino)(phenyl)methylphosphonate.....   | <b>14</b> |
| <sup>13</sup> C NMR spectrum: diethyl ( <i>N</i> -(3-fluorophenyl)sulfamoylamino)(phenyl)methylphosphonate.....  | <b>14</b> |
| <sup>31</sup> P NMR spectrum: diethyl ( <i>N</i> -(3-fluorophenyl)sulfamoylamino)(phenyl)methylphosphonate.....  | <b>15</b> |
| <sup>19</sup> F NMR spectrum: diethyl ( <i>N</i> -(3-fluorophenyl)sulfamoylamino)(phenyl)methylphosphonate.....  | <b>15</b> |
| Mass spectrum: diethyl ( <i>N</i> -(3-fluorophenyl)sulfamoylamino)(phenyl)methylphosphonate.....                 | <b>16</b> |
| <sup>1</sup> H NMR spectrum: diethyl ( <i>N</i> -(4-chlorophenyl)sulfamoylamino)(phenyl)methylphosphonate.....   | <b>17</b> |

|                                                                                                           |    |
|-----------------------------------------------------------------------------------------------------------|----|
| <sup>1</sup> H NMR spectrum: diethyl phenyl( <i>N</i> -propylsulfamoylamino)methylphosphonate.....        | 18 |
| Mass spectrum: dimethyl ( <i>N</i> -cyclohexylsulfamoylamino)(phenyl)methylphosphonate.....               | 19 |
| <sup>1</sup> H NMR spectrum: dimethyl ( <i>N</i> -cyclohexylsulfamoylamino)(phenyl)methylphosphonate..... | 20 |

## 1. Apparatus

Melting points were measured in open capillary tubes on an Electro thermal apparatus and uncorrected. Mass spectra were recorded on a shimadzu QP 1100 Ex mass spectrometer operating at an ionization potential of 70 eV. IR spectra were recorded as KBr pellets on a Perkin Elmer 781 spectrophotometer and an Impact 400 Nicolet FT-IR spectrophotometer. <sup>1</sup>H NMR, <sup>13</sup>C NMR and <sup>31</sup>P NMR spectra were recorded in DMSO-d<sub>6</sub> or CDCl<sub>3</sub> solvents on a 250, 300 or 400MHz Bruker spectrometer with tetramethylsilane as internal reference.

Ultrasound assisted reactions were carried out using a FUNGILAB ultrasonic bath with a frequency of 40 kHz and a nominal power of 250 W. The reactions were carried out in an open glass tube (diameter: 25 mm; thickness: 1 mm; volume: 20 mL) at room temperature. All reactions were monitored by thin layer chromatography (TLC) on silica Merck 60 F254 percolated aluminum plates.

## 2. General procedure

In a 10 ml round bottom flask taken a mixture of aldehyde (1 mmol) and sulfonamide (1 mmol) at room temperature and then triethylphosphite (1 mmol) was added. Then reaction mixture was subjected to the ultrasonication for appropriate time. After completion of the reaction, as indicated by TLC, silica gel; dichloromethane:methanol (9:1), a (4:1) mixture of diethyl ether and *n*-hexane was added and the mixture was cooled to 6° C overnight. The product was finally filtered and dried.

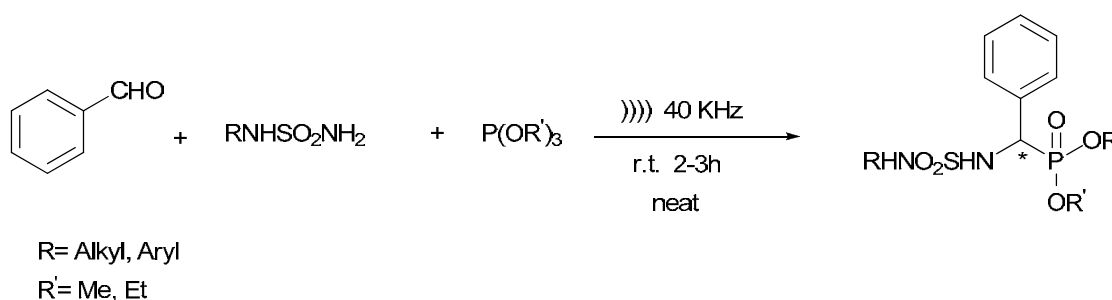

**Scheme 1:** One-potsynthesis of  $\alpha$ -sulfamidophosphonate under ultrasound irradiations.

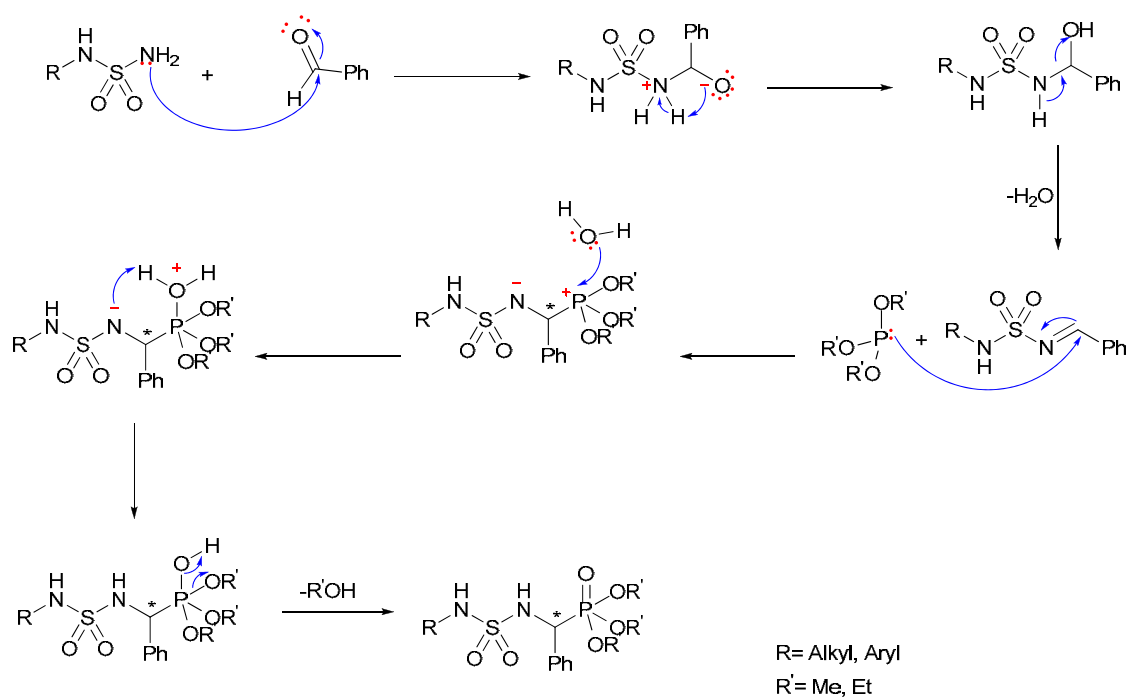

**Scheme 2:** Mechanistic proposal for synthesis of  $\alpha$ -sulfamidophosphonate.

### 3. Selected Spectral data:

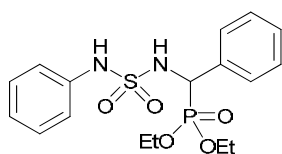

#### diethyl phenyl(*N*-phenylsulfamoylamino)methylphosphonate (Table 1, Entry 2a)

White crystal. m.p = 152-154 °C. Yield 95%.  $R_f$  (DCM-MeOH : 95/5) = 0.32. Ms ( $m/z$ ): 399 [M+1].  $\nu_{\max}$  (KBr)/ $\text{cm}^{-1}$  3210, 1675, 1387, 1262, 1151, 1023.  $\delta_p$  (160 MHz,  $\text{CDCl}_3$ ) 19.61.  $\delta_H$  (400 MHz,  $\text{CDCl}_3$ ) 1.03 (t,  $J$  7.2 Hz, 3H,  $\text{CH}_3$ ), 1.29 (t,  $J$  6.8 Hz, 3H,  $\text{CH}_3$ ), 3.59–3.67 (m, 1H,  $\text{CH}_2$ ), 3.82–3.89 (m, 1H,  $\text{CH}_2$ ), 4.06–4.17 (m, 2H,  $\text{CH}_2$ ), 4.81 (dd,  $J$  8.8 Hz, 1H, CH), 5.92 (t,  $J$  6.8 Hz, 1H, NH), 6.47 (s, 1H, NH), 6.79–6.81 (m, 2H, H-Ar), 7.01–7.25 (m, 8H, H-Ar).  $\delta_c$  (100 MHz,  $\text{CDCl}_3$ ) 16.3, 16.5, 54.8, 63.9, 64.1, 119.7, 124.4, 128.3, 128.4, 128.7, 128.9, 129.3, 134.2, 136.8. Anal. Calc. for  $\text{C}_{17}\text{H}_{23}\text{N}_2\text{O}_5\text{P}$ : C 51.25, H 5.82, N 7.03. Found: C 51.15, H 5.80, N 7.20%.  $M = 398$ .

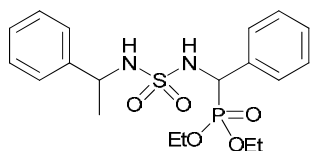

#### diethyl phenyl(*N*-(1-phenylethyl)sulfamoylamino)methylphosphonate (Table 1, Entry 2c)

White powder. m.p = 138-140 °C. Yield 90%.  $R_f$  (DCM-MeOH : 95/5) = 0.36. Ms ( $m/z$ ): 427 [M+1].  $\nu_{\max}$  (KBr)/ $\text{cm}^{-1}$  3330, 3040, 1622, 1355, 1230, 1155, 1103.  $\delta_p$  (160 MHz,  $\text{CDCl}_3$ ) 20.16.  $\delta_H$  (400 MHz,  $\text{CDCl}_3$ ) 1.08 (t,  $J$  7.2 Hz, 3H,  $\text{CH}_3$ ), 1.12 (d,  $J$  6.6 Hz, 3H,  $\text{CH}_3$ ), 1.32 (t,  $J$  7 Hz, 3H,  $\text{CH}_3$ ), 3.69 (m,

1H, CH), 3.92 (m, 1H, CH), 4.10–4.19 (m, 2H, CH<sub>2</sub>), 4.27–4.39 (m, 2H, CH<sub>2</sub>), 4.73 (dd, *J* 11.2 Hz, 1H, CH), 5.41 (t, *J* 7.7 Hz, 1H, NH), 7.15–7.27 (m, 5H, H-Ar), 7.28–7.45 (m, 5H, H-Ar).  $\delta_c$ (100 MHz, CDCl<sub>3</sub>) 17, 21.3, 48.2, 56, 62.2, 115.7, 122.8, 124, 126.3, 128.5, 129.4, 142.5, 145.1. Anal. Calc. for C<sub>19</sub>H<sub>27</sub>N<sub>2</sub>O<sub>5</sub>PS: C 53.51, H 6.38, N 6.57. Found: C 53.02, H 6.21, N 6.35%. M=426.

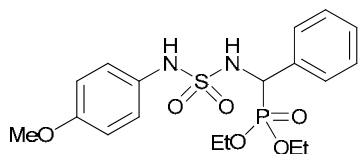

**diethyl (N-(4-methoxyphenyl)sulfamoylamino)(phenyl)methylphosphonate (Table 1, Entry 2d)**

Oil. Yield 87%.  $R_f$  (DCM-MeOH : 95/5) = 0.39. Ms (*m/z*): 429 [M+1].  $\nu_{max}$  (KBr)/cm<sup>-1</sup> 3323, 1610, 1315, 1236, 1167, 1050.  $\delta_p$ (160 MHz, CDCl<sub>3</sub>) 21.37.  $\delta_H$  (400 MHz, CDCl<sub>3</sub>) 1.21 (t, *J* 7 Hz, 3H, CH<sub>3</sub>), 1.26 (t, *J* 7 Hz, 3H, CH<sub>3</sub>), 3.75 (s, 3H, CH<sub>3</sub>), 3.94–4.01 (m, 2H, CH<sub>2</sub>), 4.00–4.15 (m, 2H, CH<sub>2</sub>), 5.03 (d, *J* 10.8 Hz, 1H, CH), 6.62–6.81 (2d, *J* 8.9 Hz, 2H, H-Ar), 7.24–7.49 (m, 7H, H-Ar).  $\delta_c$ (100 MHz, CDCl<sub>3</sub>) 16.3, 16.4, 55.4, 63.1, 63.3, 70, 71.6, 114.1, 123.2, 127, 127.1, 128, 128.1, 128.2, 128.3, 128.5, 129.6, 136.5, 136.6. Anal. Calc. for C<sub>18</sub>H<sub>25</sub>N<sub>2</sub>O<sub>6</sub>PS: C 50.46, H 5.88, N 6.54. Found: C 50.99, H 6.15, N 6.80%. M=428.

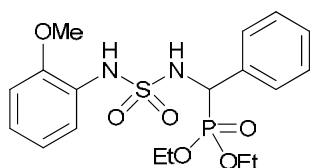

**diethyl (N-(2-methoxyphenyl)sulfamoylamino)(phenyl)methylphosphonate (Table 1, Entry 2e)**

White crystal. mp = 145–147 °C. Yield 85%.  $R_f$  (DCM-MeOH : 95/5) = 0.38. Ms (*m/z*): 429 [M+1].  $\nu_{max}$ (KBr)/cm<sup>-1</sup> 3300, 1655, 1311, 1228, 1151, 1080.  $\delta_p$  (160 MHz, CDCl<sub>3</sub>) 19.53.  $\delta_H$ (400 MHz, CDCl<sub>3</sub>) 1.01 (t, *J* 7.1 Hz, 3H, CH<sub>3</sub>), 1.29 (t, *J* 7.1 Hz, 3H, CH<sub>3</sub>), 3.81 (s, 3H, CH<sub>3</sub>), 3.54–3.83 (m, 1H, CH<sub>2</sub>), 3.84–3.87 (m, 1H, CH<sub>2</sub>), 4.04–4.16 (m, 2H, CH<sub>2</sub>), 4.74 (dd, *J* 8.8 Hz, 1H, CH), 6.00 (t, *J* 7.1 Hz, 1H, NH), 6.55–6.57 (d, *J* 8 Hz, 1H, H-Ar), 6.74 (s, 1H, NH), 6.83–6.87 (t, *J* 7.6 Hz, 1H, H-Ar), 6.91–6.95 (t, *J* 7.5 Hz, 1H, H-Ar), 7.08–7.14 (m, 5H, H-Ar), 7.39–7.43 (d, *J* 6.9 Hz, 1H, H-Ar).  $\delta_c$ (100 MHz, CDCl<sub>3</sub>) 16.3, 16.4, 55.9, 58.2, 68.2, 69, 109.9, 117.4, 120.8, 123.6, 123.9, 127.7, 127.7, 128.1, 128.3, 129.1, 138.4, 139.6. Anal. Calc. for C<sub>18</sub>H<sub>25</sub>N<sub>2</sub>O<sub>6</sub>PS: C 50.46, H 5.88, N 6.54. Found: C 50.95, H 5.71, N 6.68%. M=428.

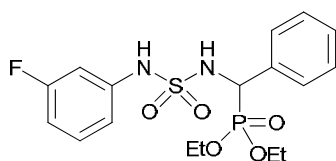

**diethyl (*N*-(3-fluorophenyl)sulfamoylamino)(phenyl)methylphosphonate (Table 1, Entry 2f)**

White crystal. mp = 109-111 °C. Yield 92%.  $R_f$  (DCM-MeOH : 95/5) = 0.45. Ms ( $m/z$ ): 417 [M+1].  $\nu_{\max}$ (KBr)/ $\text{cm}^{-1}$  3315, 1688, 1319, 1225, 1140, 1032.  $\delta_{\text{F}}$ (375 MHz,  $\text{CDCl}_3$ ) -111.62.  $\delta_{\text{P}}$ (160 MHz,  $\text{CDCl}_3$ ) 22.21.  $\delta_{\text{H}}$ (400 MHz,  $\text{CDCl}_3$ ) 1.1 (t,  $J$  7.1 Hz, 3H,  $\text{CH}_3$ ), 1.29 (t,  $J$  7 Hz, 3H,  $\text{CH}_3$ ), 3.59–3.69 (m, 1H,  $\text{CH}_2$ ), 3.87–3.96 (m, 1H,  $\text{CH}_2$ ), 4.04–4.18 (m, 2H,  $\text{CH}_2$ ), 4.71 (dd,  $J$  7.7 Hz, 1H, CH), 4.97 (t,  $J$  8.6 Hz, 1H, NH), 6.24–7.03 (m, 4H, H-Ar), 7.25–7.46 (m, 5H, H-Ar).  $\delta_{\text{C}}$  (100 MHz,  $\text{CDCl}_3$ ) 16.1, 16.4, 56.2, 64, 64.1, 106.5, 106.7, 110.6, 110.8, 114.7, 128.2, 128.7, 130.2, 130.3, 134, 138.5, 161.8. Anal. Calc. for  $\text{C}_{17}\text{H}_{22}\text{FN}_2\text{O}_5\text{PS}$ : C 49.03, H 5.33, N 6.73. Found: C 48.50, H 5.62, N 6.53%.  $M=416$ .

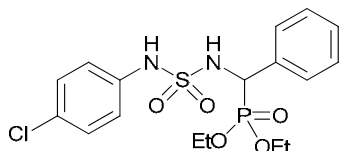

**diethyl (*N*-(4-chlorophenyl)sulfamoylamino)(phenyl)methylphosphonate (Table 1, Entry 2j)**

White crystal. mp = 116-118 °C. Yield 91%.  $R_f$  (DCM-MeOH : 95/5) = 0.46. Ms ( $m/z$ ): 433 [M+1].  $\nu_{\max}$ (KBr)/ $\text{cm}^{-1}$  3210, 1675, 1387, 1262, 1151, 1023.  $\delta_{\text{P}}$ (100 MHz,  $\text{CDCl}_3$ ) 19.66.  $\delta_{\text{H}}$  (300 MHz,  $\text{CDCl}_3$ ) 1.10 (t,  $J$  6.9 Hz, 3H,  $\text{CH}_3$ ), 1.28 (t,  $J$  7.1 Hz, 3H,  $\text{CH}_3$ ), 3.61–3.69 (m, 1H,  $\text{CH}_2$ ), 3.88–3.96 (m, 1H,  $\text{CH}_2$ ), 4.07–4.14 (m, 2H,  $\text{CH}_2$ ), 4.78 (dd,  $J$  7.7 Hz, 1H, CH), 4.82 (t,  $J$  8.2 Hz, 1H, NH), 6.50 (d,  $J$  8.85 Hz, 2H, H-Ar), 7.03 (d,  $J$  7.1 Hz, 2H, H-Ar), 7.29–7.35 (m, 5H, H-Ar).  $\delta_{\text{C}}$ (75 MHz,  $\text{CDCl}_3$ ) 16.3, 16.4, 55.5, 63.5, 63.7, 109.3, 111.2, 115.2, 124.1, 126.8, 128.3, 128.9, 131.4, 136.6, 148.4, 149.3, 163.2. Anal. Calc. for  $\text{C}_{17}\text{H}_{22}\text{ClN}_2\text{O}_5\text{PS}$ : C 47.17, H 5.12, N 6.47. Found: C 46.95, H 5.58, N 6.46%.  $M=432$ .

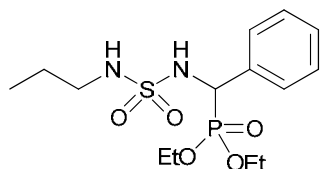

**diethyl phenyl(*N*-propylsulfamoylamino)methylphosphonate (Table 1, Entry 2n)**

White powder. mp = 136-138 °C. Yield 88%.  $R_f$  (DCM-MeOH : 95/5) = 0.41. Ms ( $m/z$ ): 366 [M+1].  $\nu_{\max}$ (KBr)/ $\text{cm}^{-1}$  3265, 2978, 1593, 1372, 1264, 1154, 1077.  $\delta_{\text{P}}$ (120 MHz,  $\text{CDCl}_3$ ) 19.88.  $\delta_{\text{H}}$  (300 MHz,  $\text{CDCl}_3$ ) 0.72 (t,  $J$  7.3 Hz, 3H,  $\text{CH}_3$ ), 1.09 (t,  $J$  7.1 Hz, 3H,  $\text{CH}_3$ ), 1.14–1.29 (m, 2H,  $\text{CH}_2$ ), 1.37 (t,  $J$  7.1 Hz, 3H,  $\text{CH}_3$ ), 2.54 (m, 1H,  $\text{CH}_2\text{-N}$ ), 2.82 (m, 1H,  $\text{CH}_2\text{-N}$ ), 3.67–3.76 (m, 1H,  $\text{CH}_2$ ), 3.89–3.97 (m, 1H,  $\text{CH}_2$ ), 4.07 (t,  $J$  6 Hz, 1H, NH), 4.18–4.27 (m, 2H,  $\text{CH}_2$ ), 4.75 (dd,  $J$  8.8 Hz, 1H, CH), 6.03 (t,  $J$  6.6 Hz, 1H, NH), 7.28–7.52 (m, 5H, H-Ar).  $\delta_{\text{C}}$  (75 MHz,  $\text{CDCl}_3$ ) 11.1, 16.3, 16.4, 21.7, 24.5, 55.4, 66.2, 66.3, 124.6, 127.1, 127.3, 129, 129.2, 137.1. Anal. Calc. for  $\text{C}_{14}\text{H}_{25}\text{N}_2\text{O}_5\text{PS}$ : C 46.14, H 6.92, N 7.69. Found: C 46.10, H 7.08, N 7.55%.  $M=365$ .

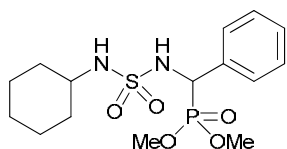

**dimethyl (*N*-cyclohexylsulfamoylamino)(phenyl)methylphosphonate (Table 1, Entry 2q)**

White crystal. mp = 137-139 °C. Yield 94%.  $R_f$  (DCM-MeOH : 95/5) = 0.39. Ms ( $m/z$ ): 399 [M+23].  $\nu_{\max}$ (KBr)/ $\text{cm}^{-1}$  3468, 3065, 1631, 1368, 1259, 1152, 1100.  $\delta_p$ (120 MHz,  $\text{CDCl}_3$ ) 19.98.  $\delta_H$  (300 MHz,  $\text{CDCl}_3$ ) 0.9 (m, 4H, 2CH<sub>2</sub>), 1.1 (m, 2H, CH<sub>2</sub>), 1.39 (m, 2H, CH<sub>2</sub>), 1.55 (m, 1H, CH<sub>2</sub>), 1.84 (m, 1H, CH<sub>2</sub>), 2.45 (m, 1H, CH), 3.47 (d,  $J$  9 Hz, 3H, CH<sub>3</sub>), 3.67 (d,  $J$  7.2 Hz, 3H, CH<sub>3</sub>), 4.61 (dd,  $J$  6.8 Hz, 1H, CH), 6.72 (d,  $J$  6.5 Hz, 1H, NH), 7.27-7.51 (m, 5H, H-Ar).  $\delta_c$ (75 MHz,  $\text{CDCl}_3$ ) 21.5, 24.6, 25.1, 33.9, 53.4, 53.5, 56.1, 126.2, 129.5, 129.8, 136.5. Anal. Calc. for C<sub>15</sub>H<sub>25</sub>N<sub>2</sub>O<sub>3</sub>PS: C 47.86, H 6.69, N 7.44. Found: C 48.03, H 6.65, N 7.40%. M=376.

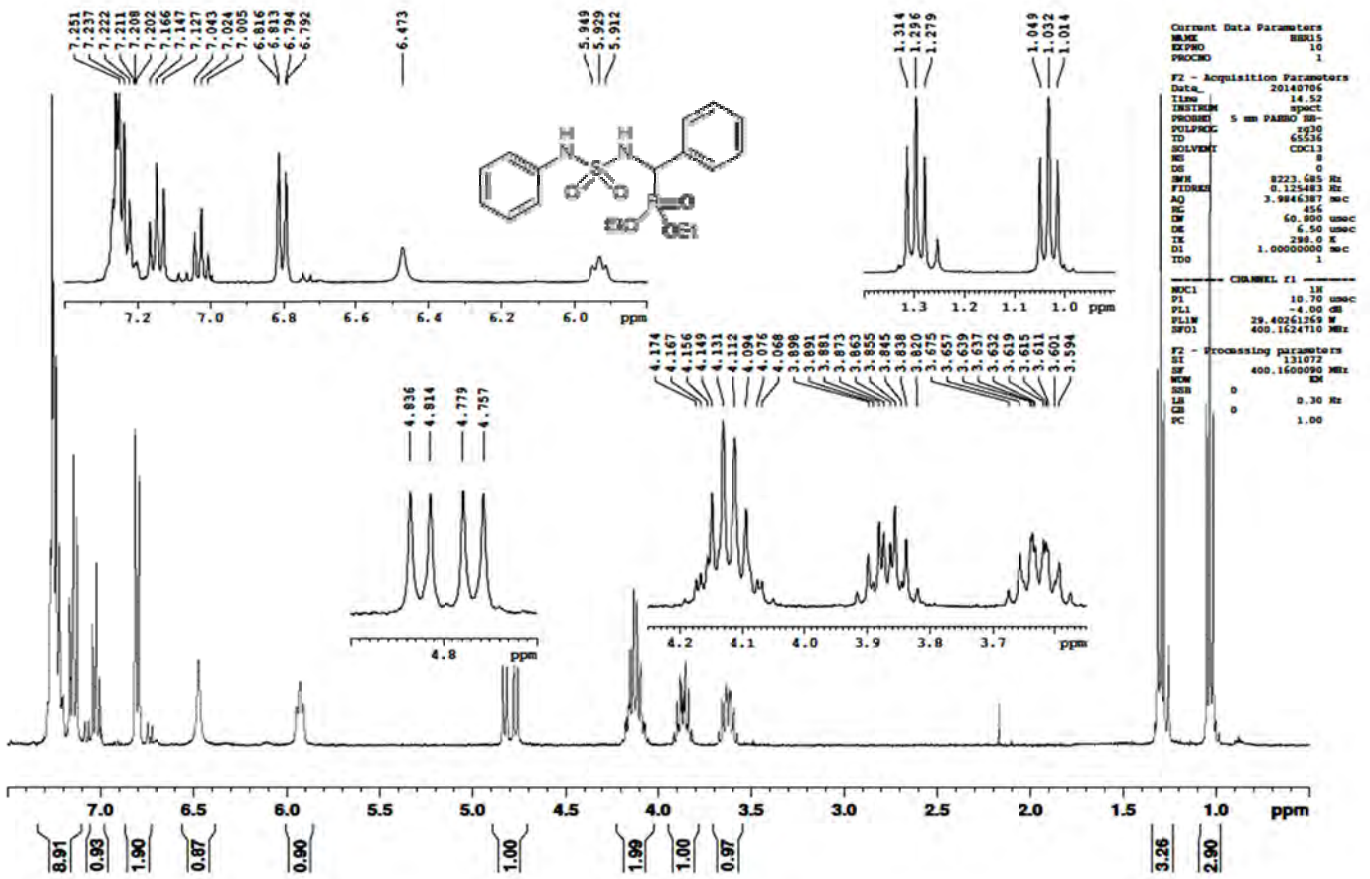

<sup>1</sup>H NMR spectrum: diethyl phenyl(*N*-phenylsulfamoylamino)methylphosphonate

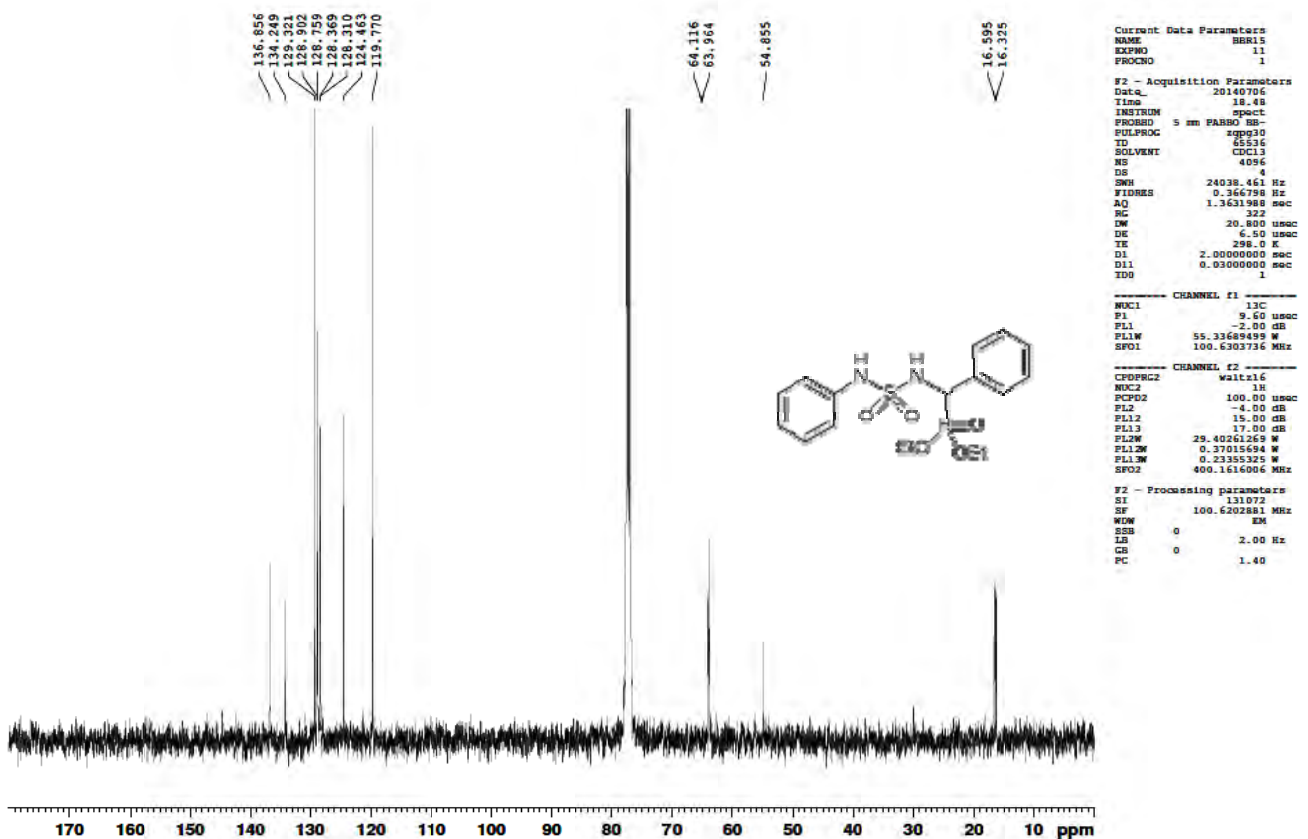

<sup>13</sup>C NMR spectrum: diethyl phenyl(*N*-phenylsulfamoylamino)methylphosphonate



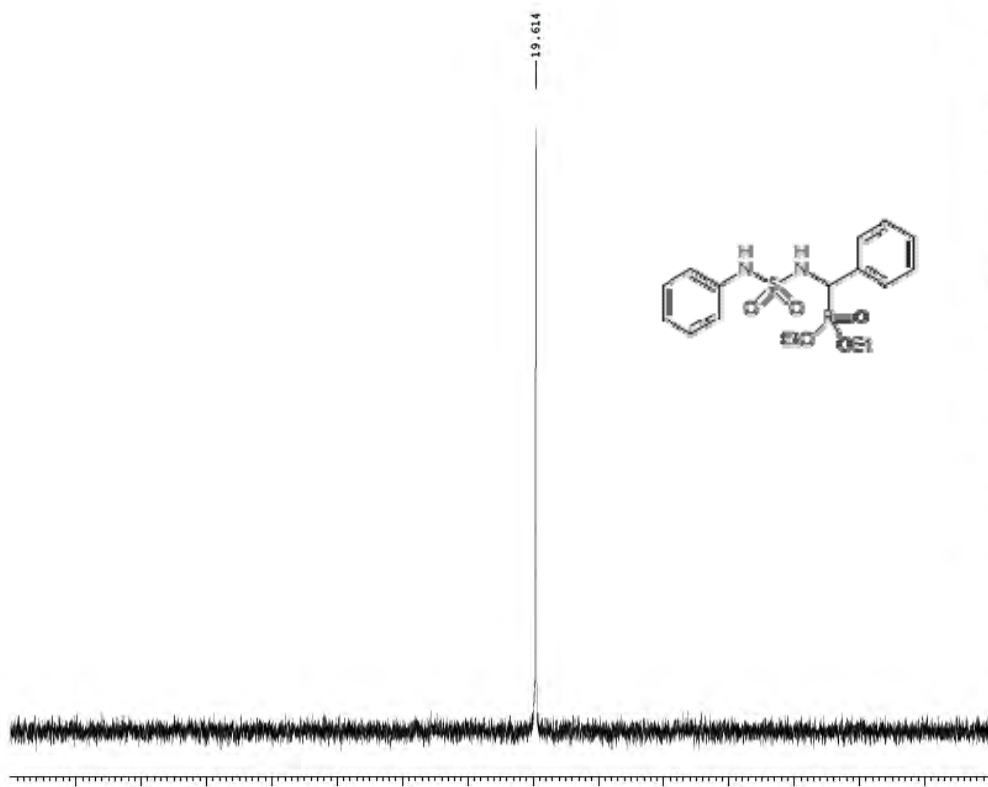

```

Current Data Parameters
NAME      bbr15
EXPNO    12
PROCNO   1

F2 - Acquisition Parameters
Date_    20140706
Time     18.53
INSTRUM  spect
PROBHD   5 mm PABBO BBI
PULPROG  zgpg30
TD       65536
SOLVENT  CDCl3
NS       64
DS       4
SWH      64102.563 Hz
FIDRES   0.976127 Hz
AQ       0.5112308 sec
RG       2050
RW       7.800 usec
DE       6.50 usec
TE       298.1 K
D1       2.0000000 sec
D11      0.0300000 sec
TD0      1

----- CHANNEL f1 -----
NUC1     31P
P1       9.75 usec
PL1      -1.00 dB
PL1W     32.16036224 MHz
SFO1     161.9796380 MHz

----- CHANNEL f2 -----
CROPRG2  waltz16
NUC2     1H
PCPD2    100.00 usec
PL2      -4.00 dB
PL12     15.00 dB
PL13     17.00 dB
PL1W     29.40261259 W
PL1W     0.37015694 W
PL1W     0.23355325 W
SFO2     400.1516006 MHz

F2 - Processing parameters
SI       131072
SF       161.9877370 MHz
WDW      EM
SSB      0
LB       2.00 Hz
GB       0
PC       1.40

```

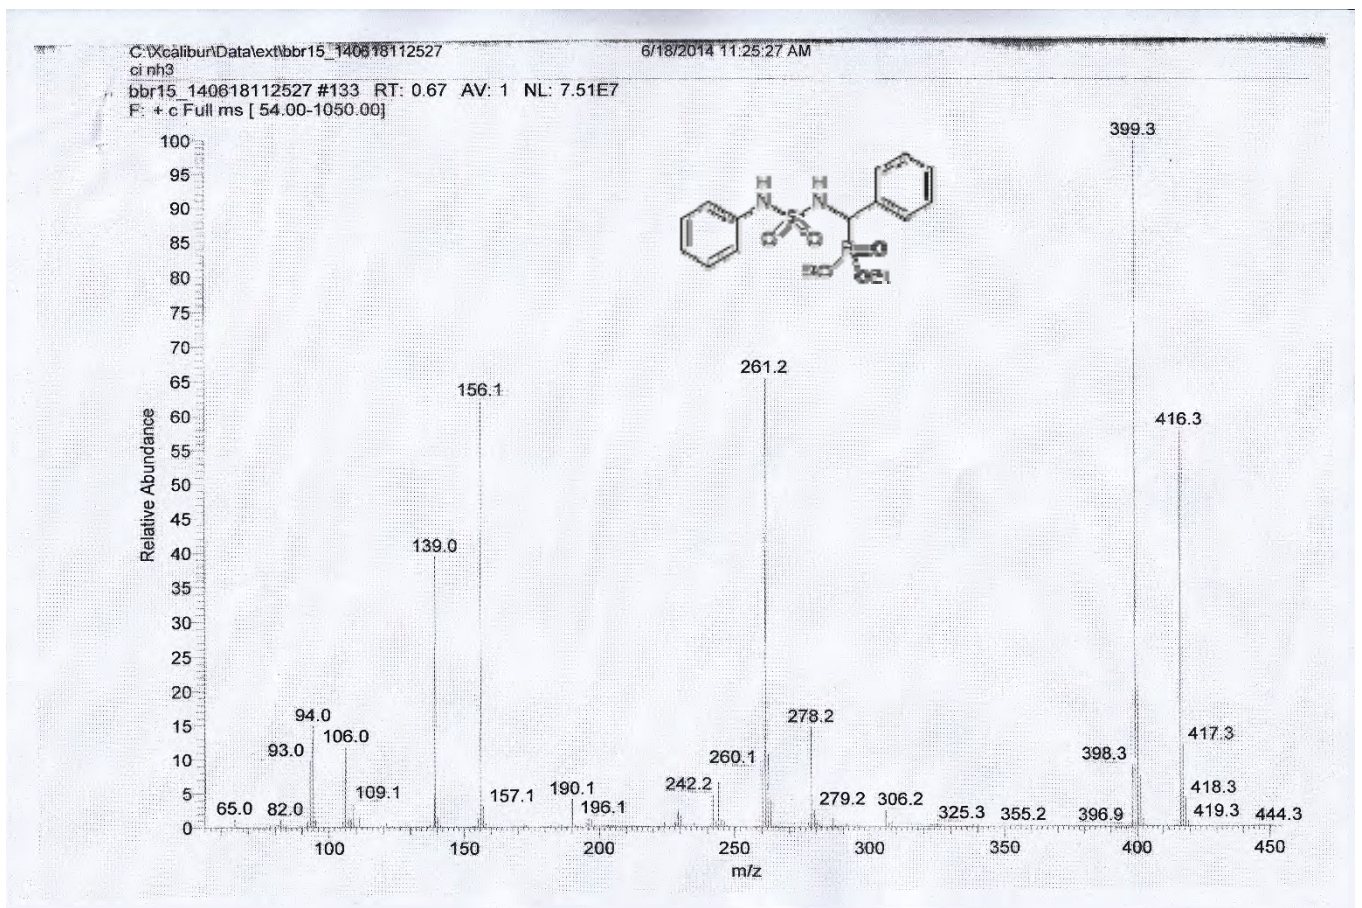

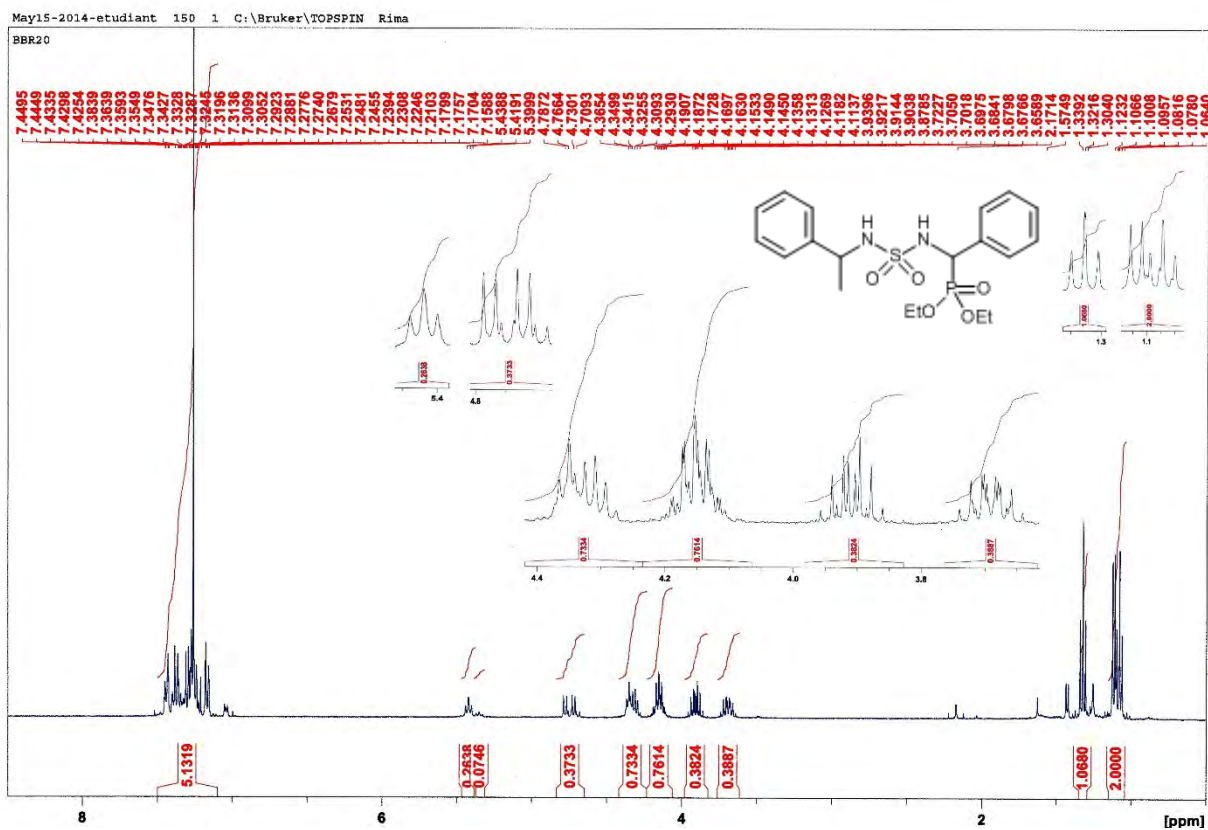

<sup>1</sup>H NMR spectrum: diethyl phenyl(*N*-(1-phenylethyl)sulfamoylamino)methylphosphonate

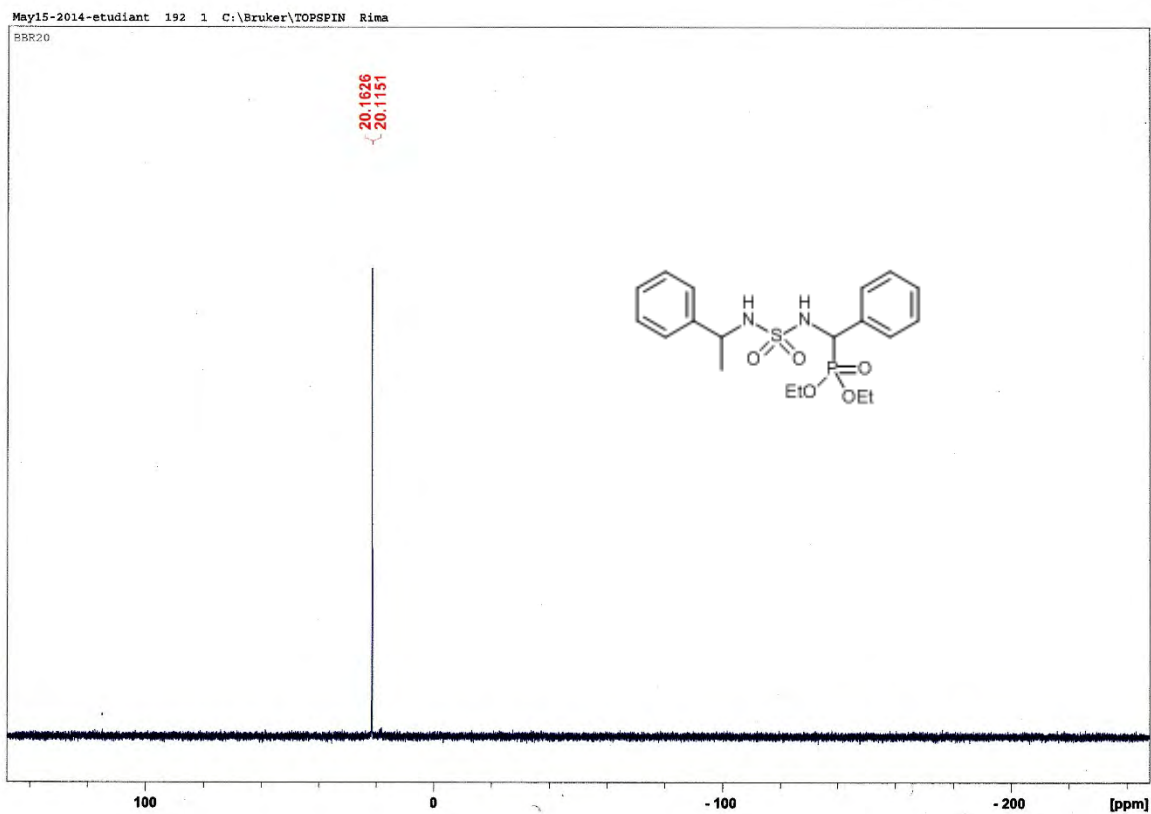

<sup>31</sup>P NMR spectrum: diethyl phenyl(*N*-(1-phenylethyl)sulfamoylamino)methylphosphonate

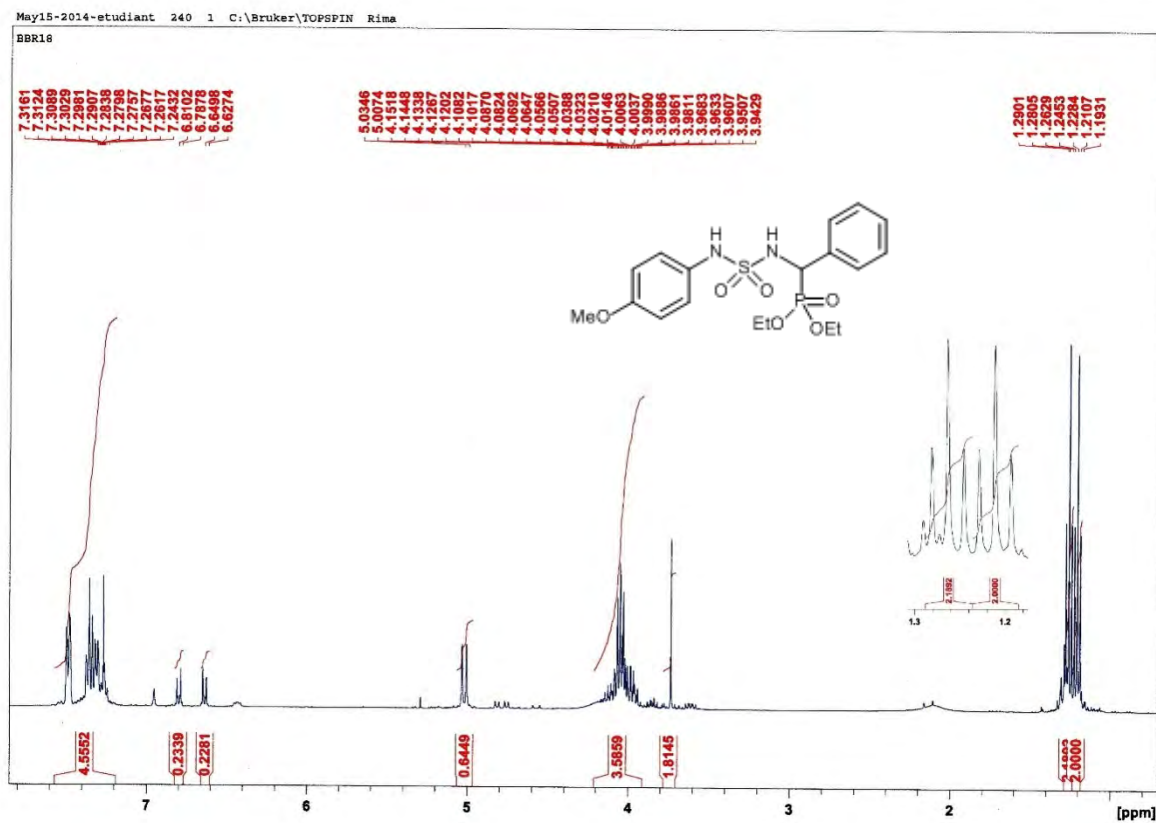

<sup>1</sup>H NMR spectrum: diethyl (*N*-(4-methoxyphenyl)sulfamoylamino)(phenyl)methylphosphonate

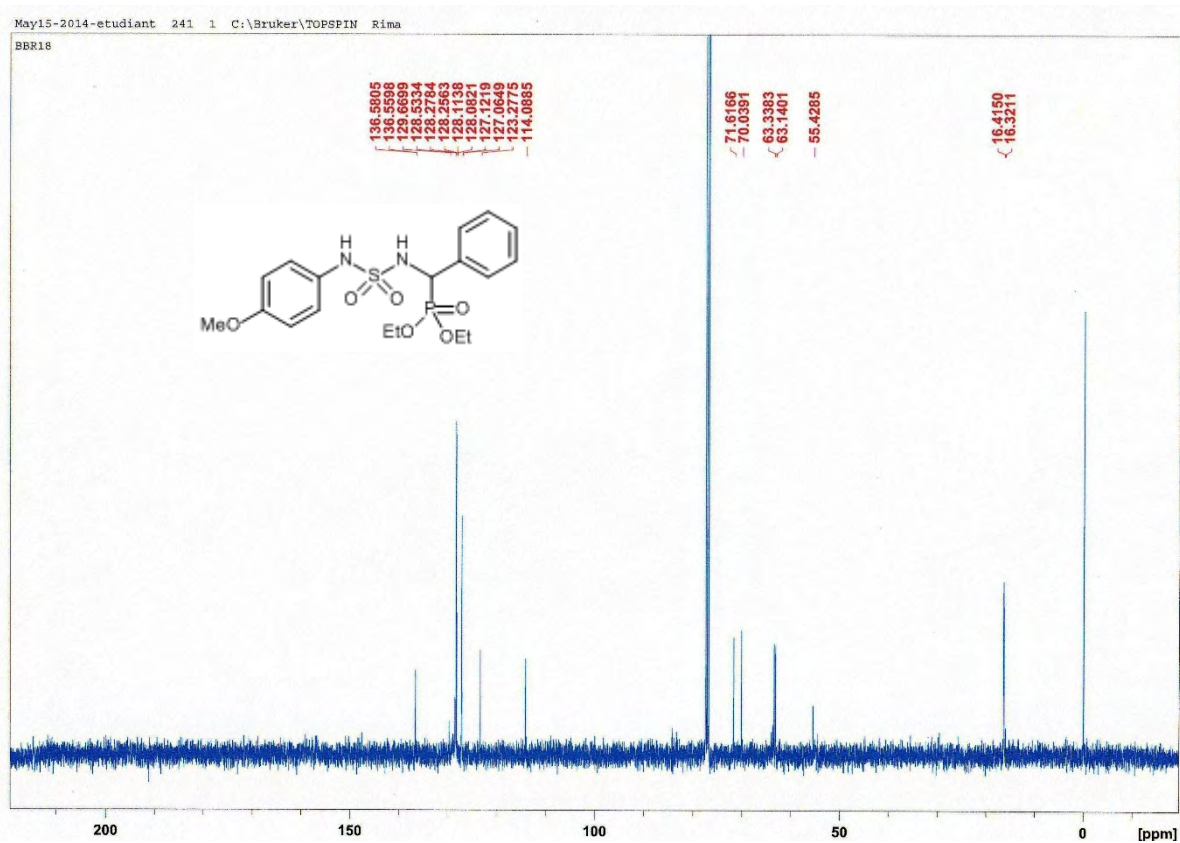

<sup>13</sup>C NMR spectrum: diethyl (*N*-(4-methoxyphenyl)sulfamoylamino)(phenyl)methylphosphonate

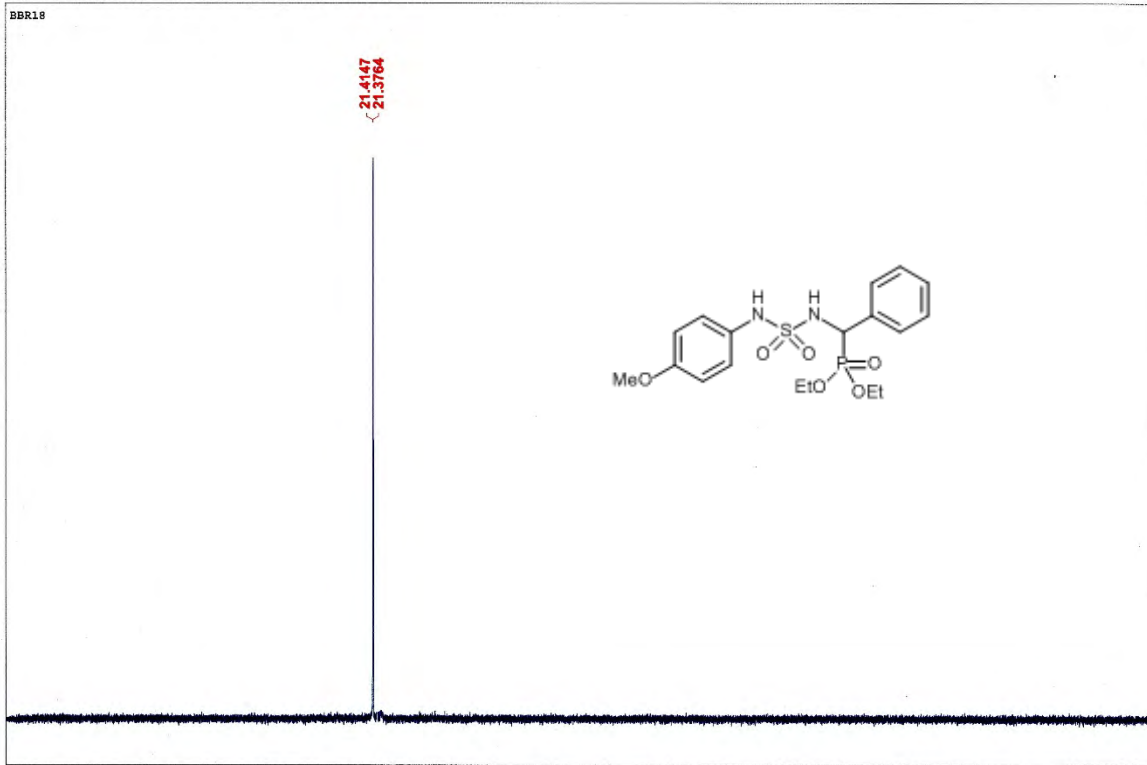

$^{31}\text{P}$  NMR spectrum: diethyl (N-(4-methoxyphenyl)sulfamoylamino)(phenyl)methylphosphonate

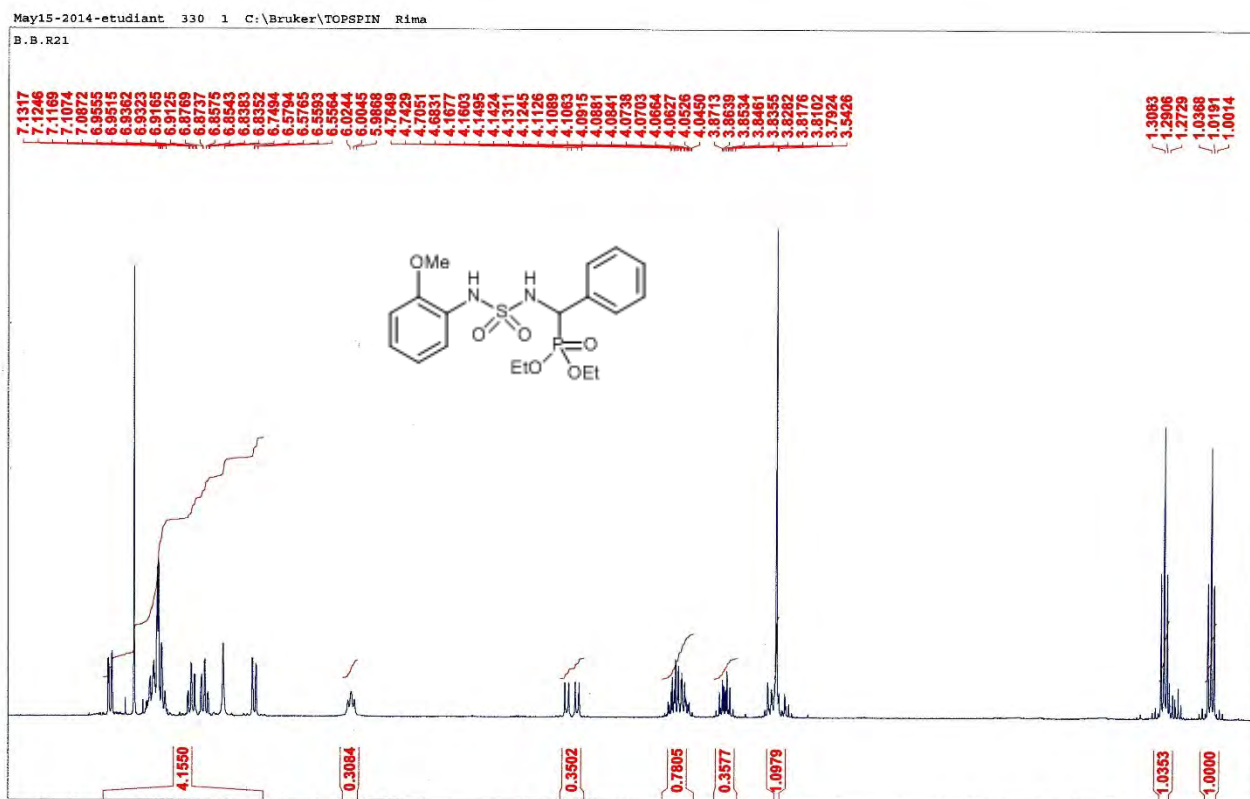

<sup>1</sup>H NMR spectrum: diethyl (*N*-(2-methoxyphenyl)sulfamoylamino)(phenyl)methylphosphonate

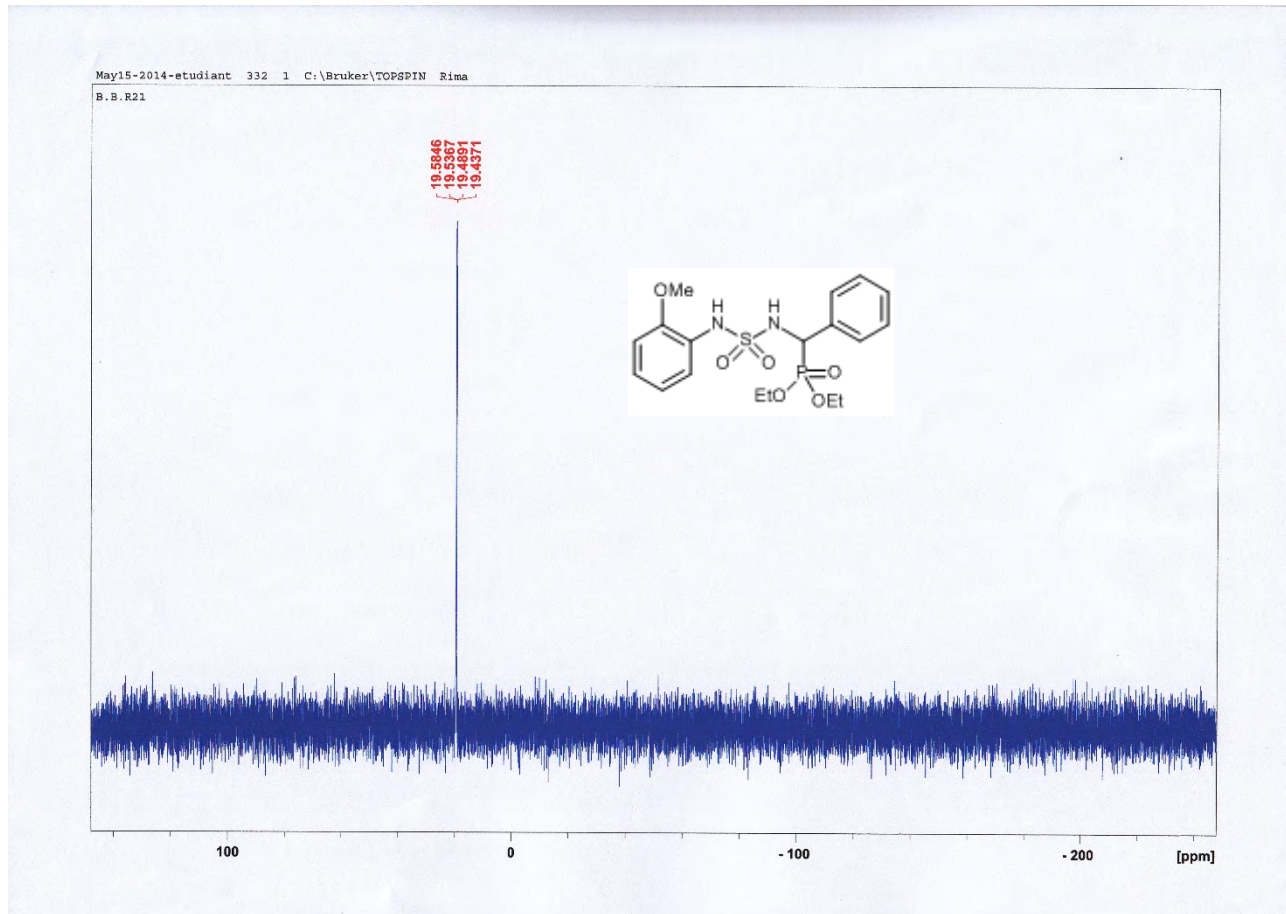

<sup>31</sup>P NMR spectrum: diethyl (*N*-(2-methoxyphenyl)sulfamoylamino)(phenyl)methylphosphonate

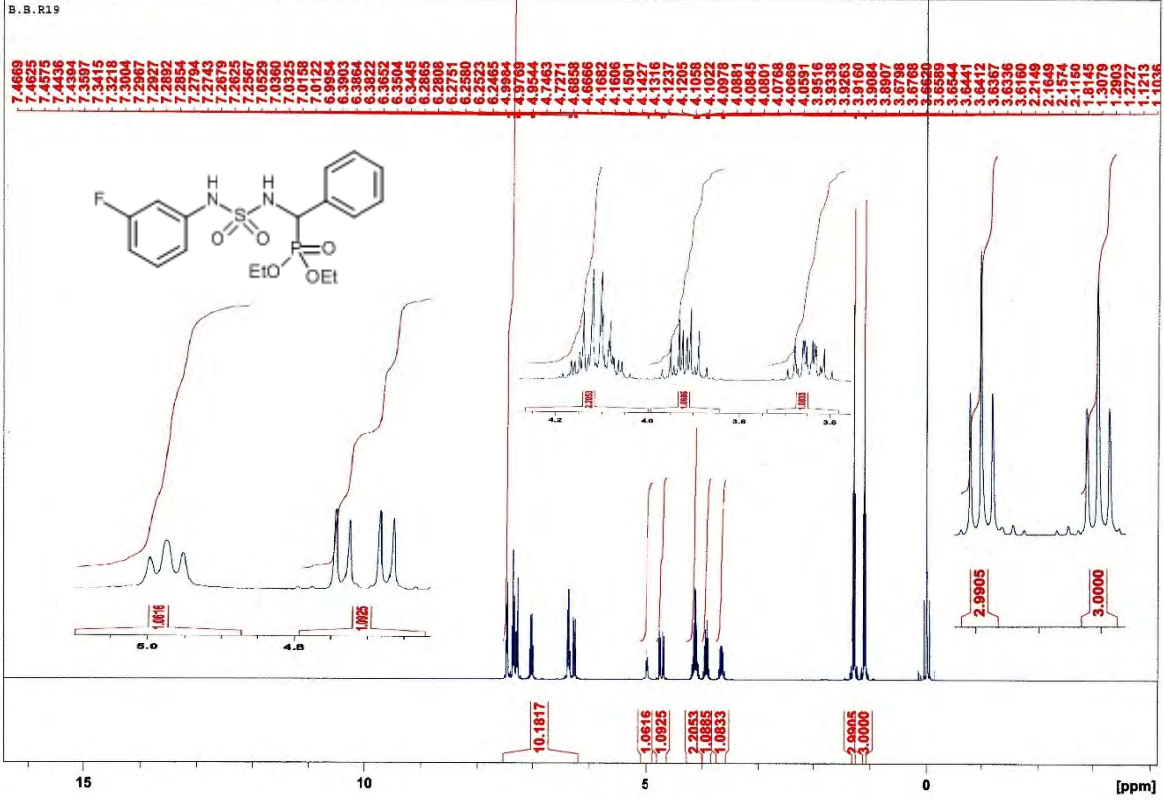

<sup>1</sup>H NMR spectrum: diethyl (N-(3-fluorophenyl)sulfamoylamino)(phenyl)methylphosphonate

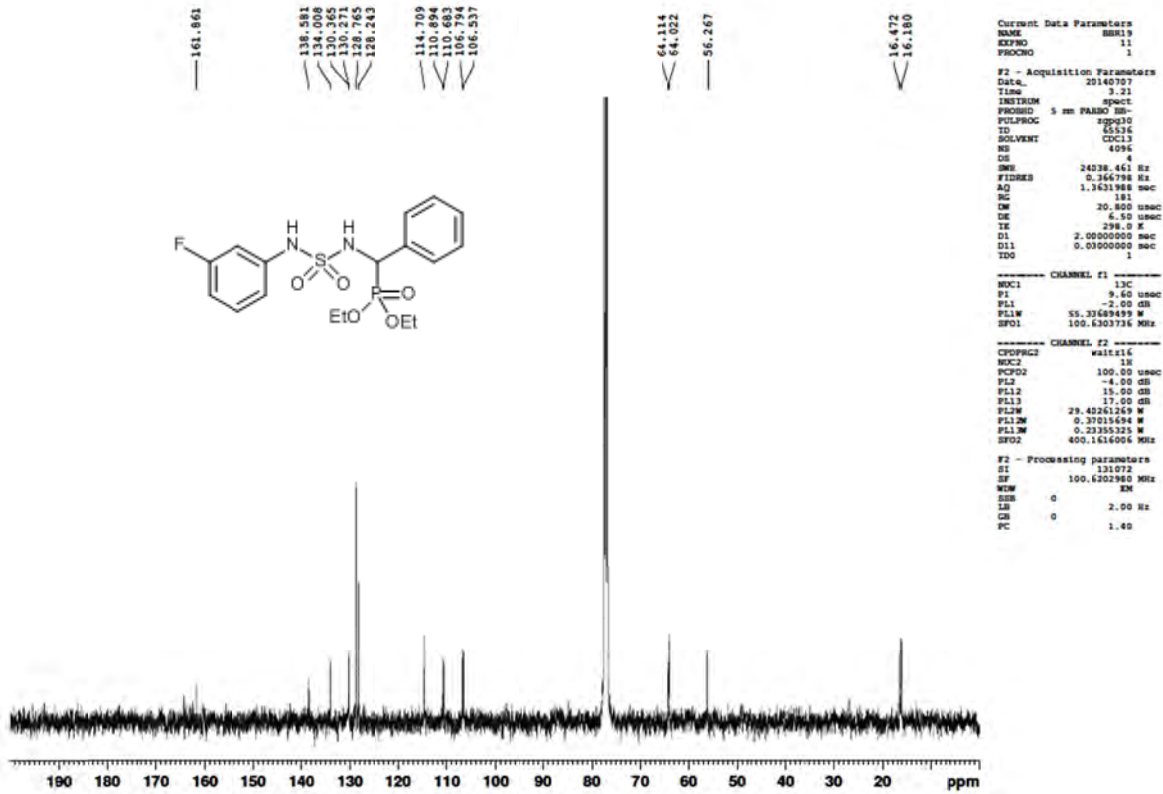

<sup>13</sup>C NMR spectrum: diethyl (N-(3-fluorophenyl)sulfamoylamino)(phenyl)methylphosphonate

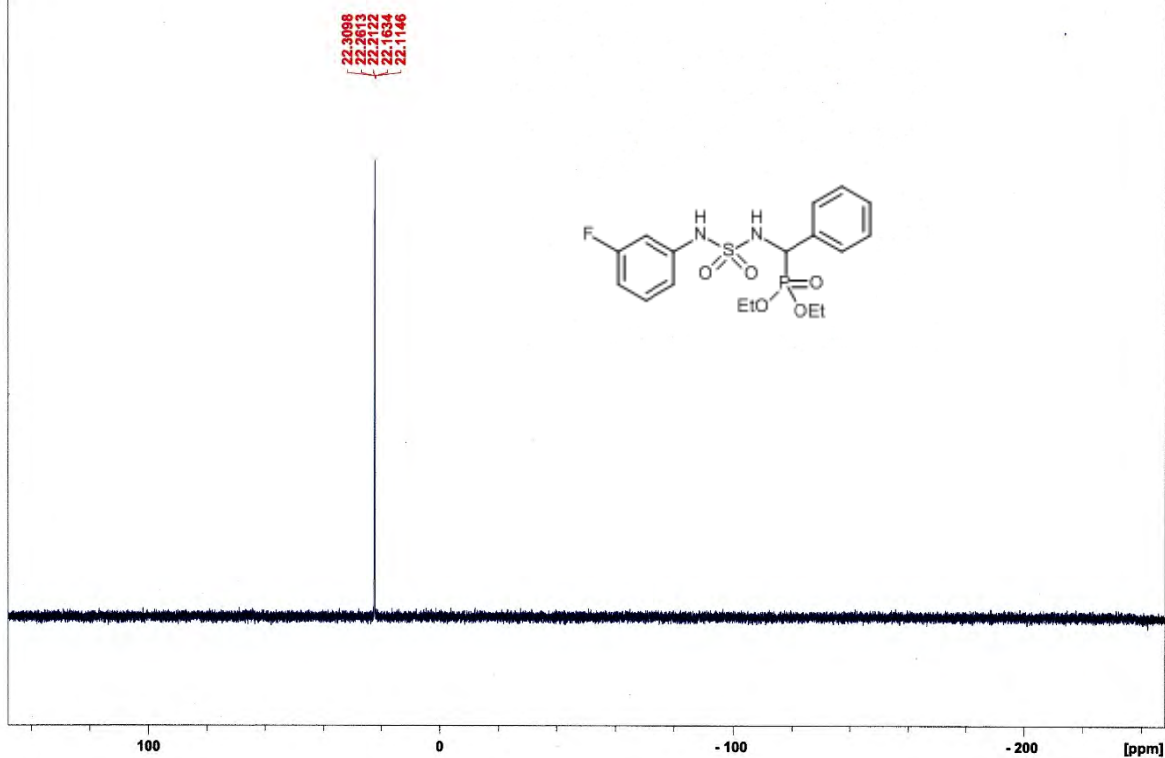

<sup>31</sup>P NMR spectrum: diethyl (*N*-(3-fluorophenyl)sulfamoylamino)(phenyl)methylphosphonate

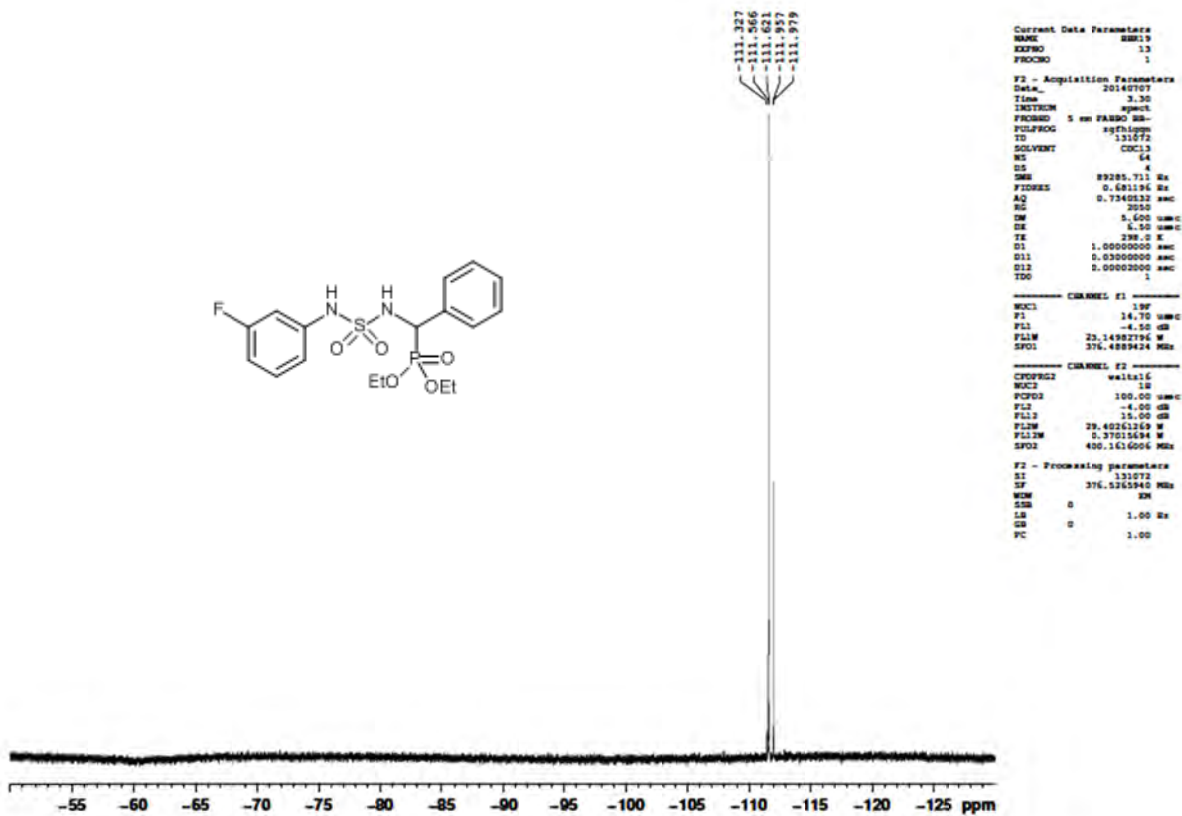

<sup>19</sup>F NMR spectrum: diethyl (*N*-(3-fluorophenyl)sulfamoylamino)(phenyl)methylphosphonate

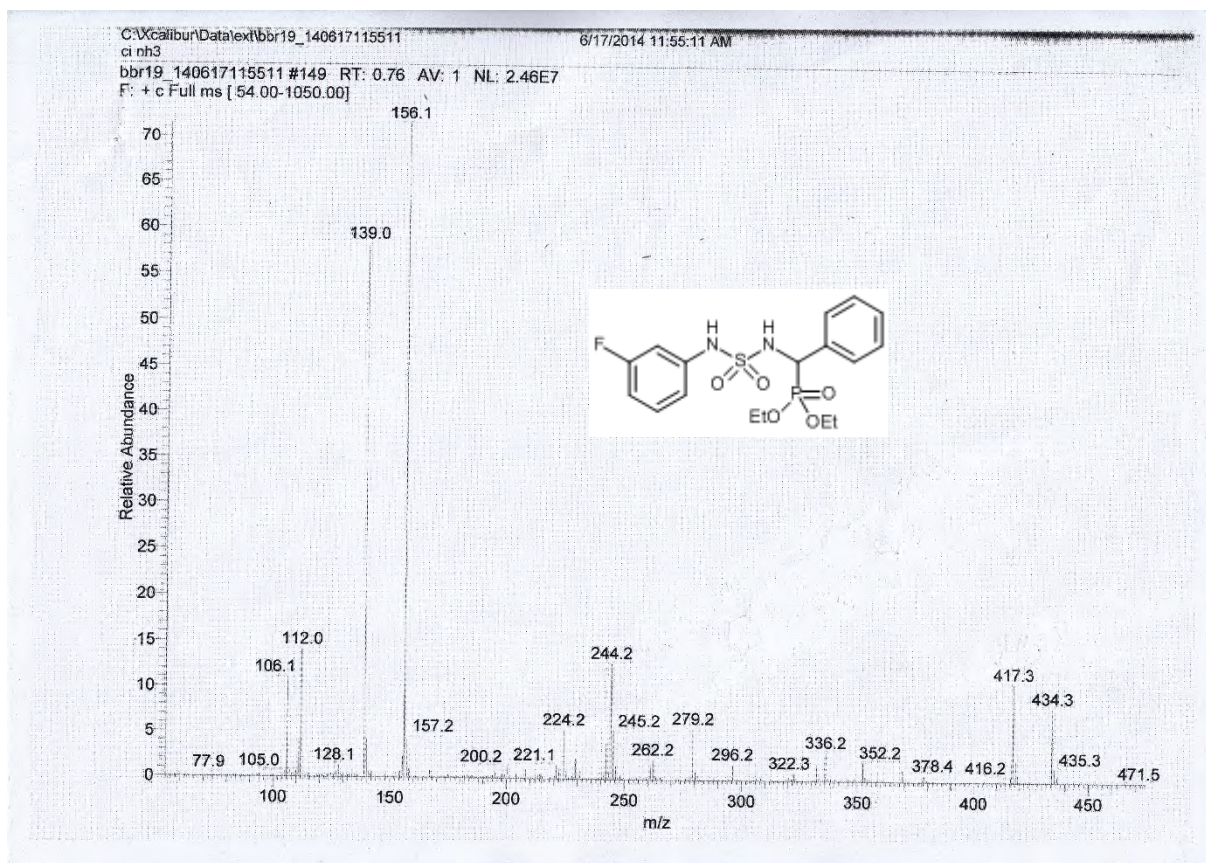

Mass spectrum: diethyl (N-(3-fluorophenyl)sulfamoylamino)(phenyl)methylphosphonate



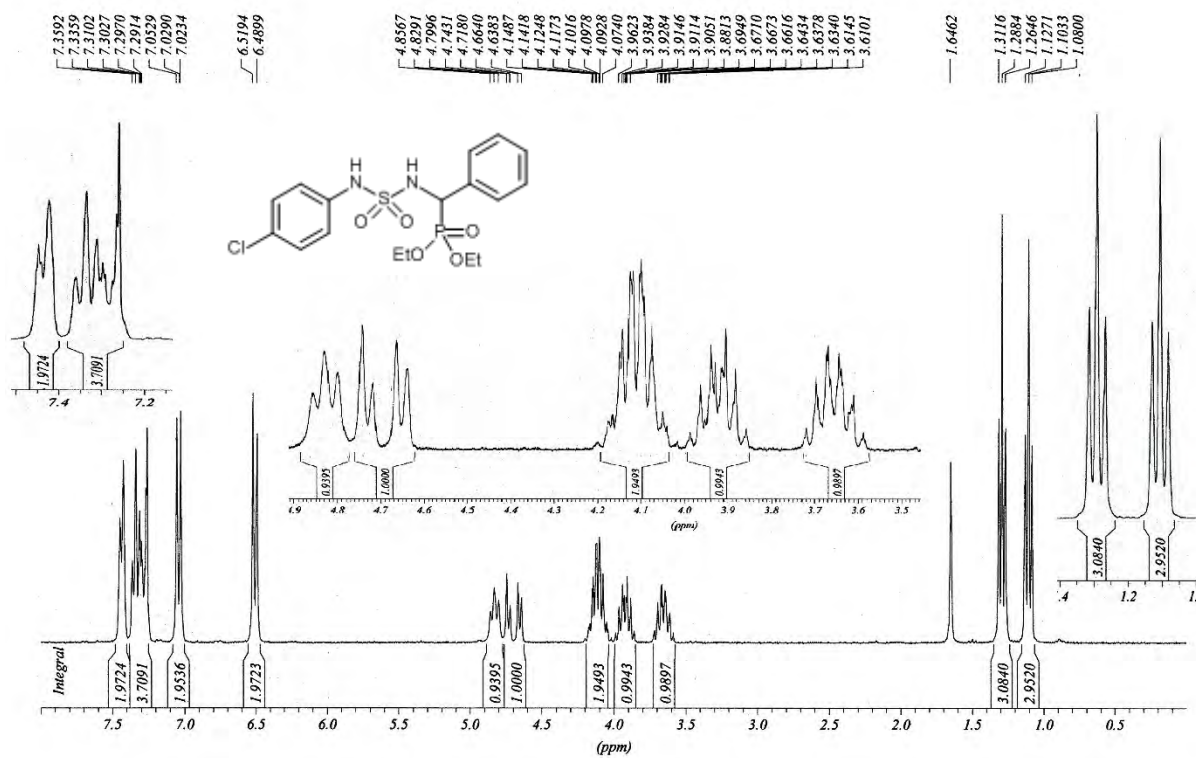

**<sup>1</sup>H NMR spectrum: diethyl (N-(4-chlorophenyl)sulfamoylamino)(phenyl)methylphosphonate**

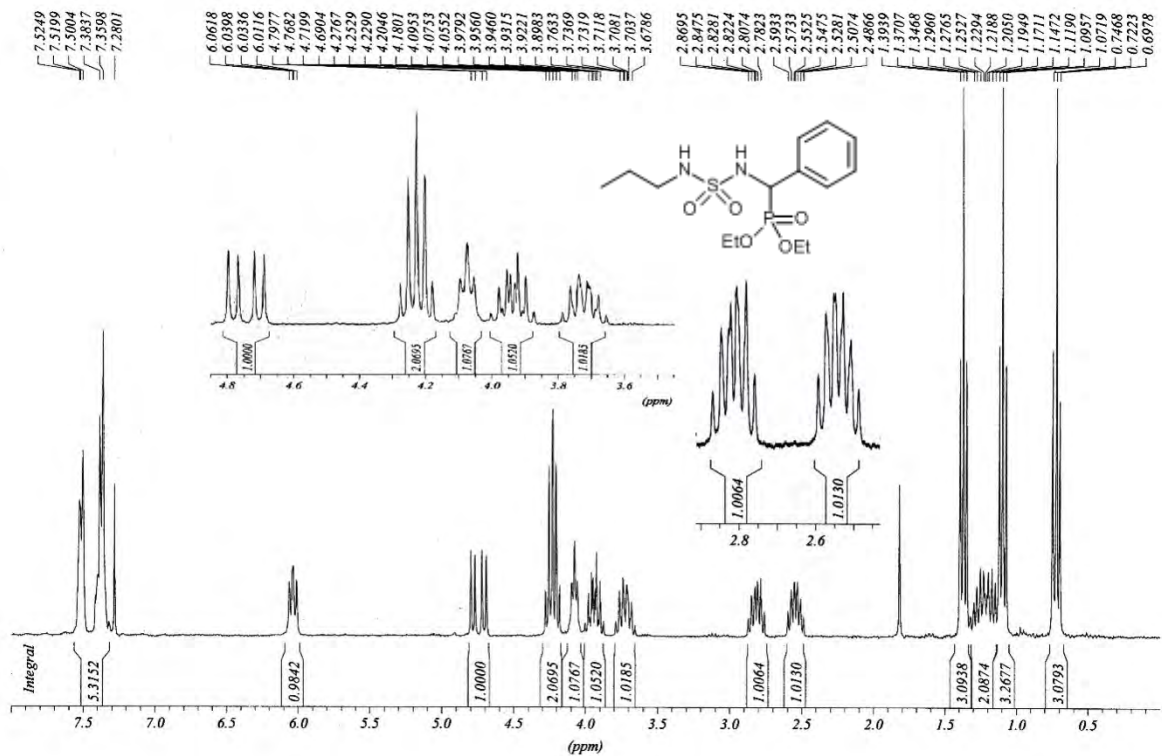

**<sup>1</sup>H NMR spectrum: diethyl phenyl(N-propylsulfamoylamino)methylphosphonate**

BPP4 ESI+ 140328162401 #1 RT: 0.00 AV: 1 NL: 1.32E5  
T: ITMS + c ESI Full ms [150.00-2000.00]

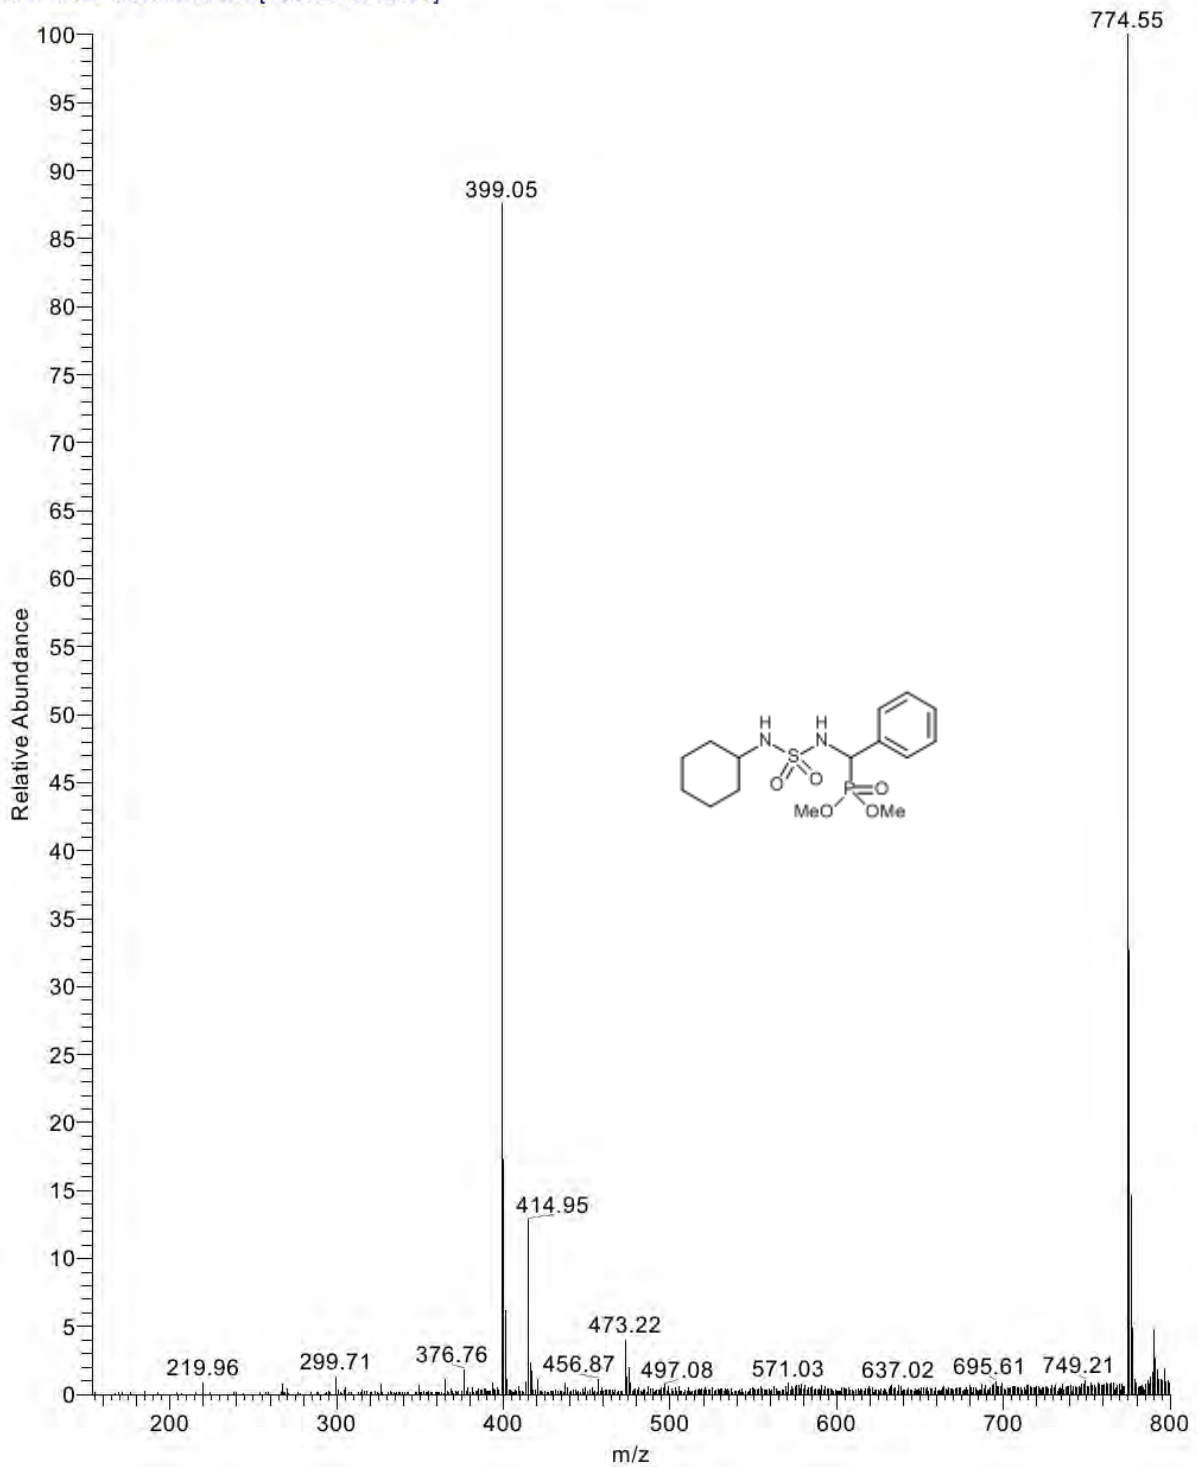

Mass spectrum: dimethyl (N-cyclohexylsulfamoylamino)(phenyl)methylphosphonate

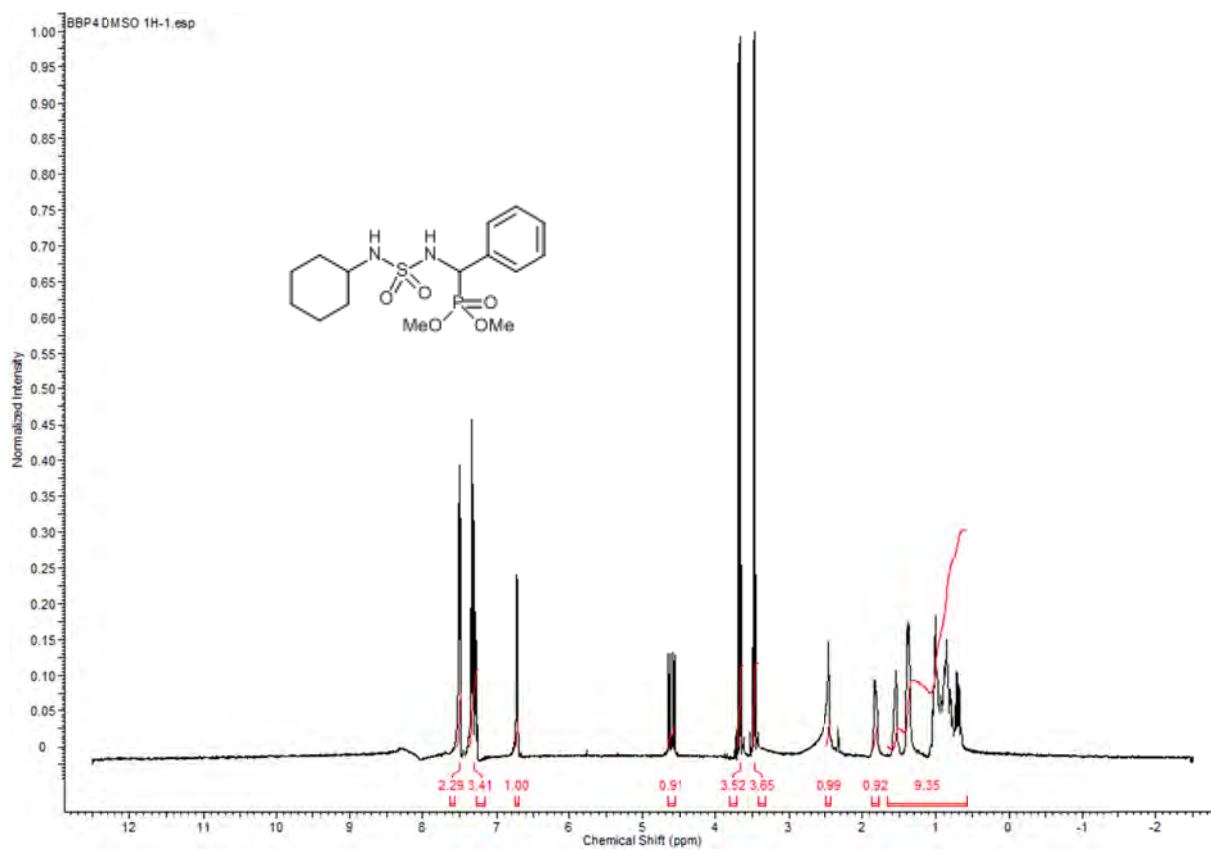

**<sup>1</sup>H NMR spectrum: dimethyl (N-cyclohexylsulfamoylamino)(phenyl)methylphosphonate**
